# Supplementary material for: Effects of elemene on inhibiting proliferation of vascular smooth muscle cells and promoting reendothelialization at the stent implantation site
Source: Royal Society of Chemistry journal article supplement (doi:10.1039/c7bm00190h), 2017-01-01
Supplement: c7bm00190h1.pdf [file c7bm00190h1.pdf]

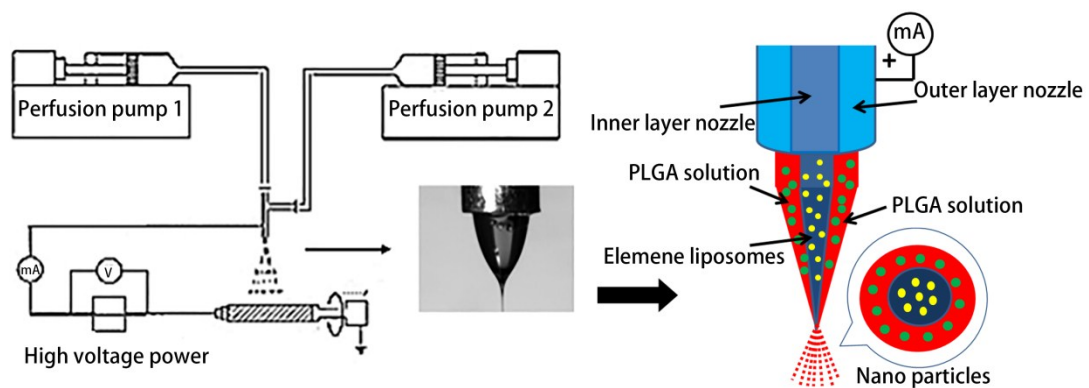

**Supplementary Figure S1.** The diagrammatic sketch of electrostatic spray elemene liposome membranes and elemene-coated stents.
